# Supplementary material for: Single and Repeated Oral Dose Toxicity and Genotoxicity of the Leaves of Butterbur
Source: MDPI journal article supplement (doi:10.3390/foods10081963), 2021-08-23
Supplement: s1 [file s1]

**Table S1.** Summary of Body Weight and Food Intake of Sprague-Dawley Rats

| Week                   | Group / Dose (mg/kg/day) |              |              |              |
|------------------------|--------------------------|--------------|--------------|--------------|
|                        | G1 / 0                   | G2 / 1,250   | G3 / 2,500   | G4 / 5,000   |
| <b>Body weight (g)</b> |                          |              |              |              |
| <b>Sex : Male</b>      |                          |              |              |              |
| 0                      | 211.7 ± 6.7              | 210.7 ± 6.8  | 211.7 ± 6.2  | 210.5 ± 3.5  |
| 4                      | 364.7 ± 31.5             | 363.5 ± 26.9 | 373.6 ± 31.5 | 360.2 ± 21.0 |
| 8                      | 520.5 ± 58.0             | 513.3 ± 214  | 514.7 ± 54.9 | 507.1 ± 40.5 |
| 13                     | 605.1 ± 62.9             | 595.7 ± 67.1 | 624.3 ± 61.6 | 589.7 ± 47.1 |
| <b>Sex: Female</b>     |                          |              |              |              |
| 0                      | 159.6 ± 5.4              | 160.0 ± 5.8  | 159.8 ± 6.5  | 159.6 ± 8.5  |
| 4                      | 227.1 ± 23.0             | 220.3 ± 9.0  | 222.8 ± 5.0  | 220.0 ± 23.8 |
| 8                      | 295.3 ± 34.2             | 281.1 ± 12.4 | 282.9 ± 25.9 | 284.5 ± 32.6 |
| 13                     | 336.2 ± 33.8             | 314.4 ± 19.9 | 312.9 ± 27.1 | 321.0 ± 39.3 |
| <b>Food intake (g)</b> |                          |              |              |              |
| <b>Sex : Male</b>      |                          |              |              |              |
| 0                      | 30.1 ± 2.1               | 30.0 ± 2.3   | 30.5 ± 3.3   | 29.6 ± 2.0   |
| 4                      | 35.2 ± 3.6               | 36.2 ± 2.0   | 36.6 ± 4.8   | 34.8 ± 3.0   |
| 8                      | 36.7 ± 3.7               | 37.1 ± 4.1   | 37.5 ± 4.0   | 35.8 ± 3.5   |
| 13                     | 34.5 ± 3.4               | 34.6 ± 3.6   | 34.7 ± 3.0   | 33.5 ± 3.2   |
| <b>Sex: Female</b>     |                          |              |              |              |
| 0                      | 22.3 ± 1.9               | 23.1 ± 2.5   | 22.1 ± 2.3   | 23.1 ± 3.1   |
| 4                      | 25.2 ± 3.1               | 23.9 ± 1.6   | 24.1 ± 1.7   | 24.7 ± 3.2   |
| 8                      | 25.7 ± 2.3               | 24.2 ± 1.7   | 24.3 ± 2.0   | 25.3 ± 3.2   |
| 13                     | 24.2 ± 1.3               | 22.5 ± 2.2   | 22.6 ± 2.5   | 23.9 ± 3.2   |

**Table S2.** Summary of Ophthalmological Examinations

| Eye<br>(Bilateral) | No. of<br>animals | Findings | Group / Dose (mg/kg/day) |            |            |            |
|--------------------|-------------------|----------|--------------------------|------------|------------|------------|
|                    |                   |          | G1 / 0                   | G2 / 1,250 | G3 / 2,500 | G4 / 5,000 |
| Sex : Male         |                   |          |                          |            |            |            |
| Pupil light reflex | 5                 | Normal   | 5                        | 5          | 5          | 5          |
| Anterior segment   | 5                 | Normal   | 5                        | 5          | 5          | 5          |
| Transparent media  | 5                 | Normal   | 5                        | 5          | 5          | 5          |
| Fundus             | 5                 | Normal   | 5                        | 5          | 5          | 5          |
| Sex: Female        |                   |          |                          |            |            |            |
| Pupil light reflex | 5                 | Normal   | 5                        | 5          | 5          | 5          |
| Anterior segment   | 5                 | Normal   | 5                        | 5          | 5          | 5          |
| Transparent media  | 5                 | Normal   | 5                        | 5          | 5          | 5          |
| Fundus             | 5                 | Normal   | 5                        | 5          | 5          | 5          |

Table S3. Summary of Urinalysis Results

| Urinalysis parameters |             | Group / Dose (mg/kg/day) |            |            |            |
|-----------------------|-------------|--------------------------|------------|------------|------------|
|                       |             | G1 / 0                   | G2 / 1,250 | G3 / 2,500 | G4 / 5,000 |
| No. of animals        |             | 5                        | 5          | 5          | 5          |
| <b>Sex : Male</b>     |             |                          |            |            |            |
| Volume (mL)           |             | 12.5 ± 3                 | 14.0 ± 7   | 11.8 ± 6   | 15.7 ± 6   |
| Color                 | Pale yellow | 3                        | -          | -          | -          |
|                       | Yellow      | 2                        | 5          | 5          | 5          |
|                       | Amber       | -                        | -          | -          | -          |
| Transparency          | Clear       | 5                        | 5          | 5          | 5          |
| pH                    | 7           | 2                        | -          | -          | -          |
|                       | 8           | 3                        | 5          | 5          | 4          |
|                       | 9           | -                        | -          | -          | 1          |
| Protein (mg/dL)       | -           | 2                        | 2          | 4          | 3          |
|                       | 25          | 2                        | 2          | 1          | 2          |
|                       | 75          | 1                        | 1          | -          | -          |
|                       | 150         | -                        | -          | -          | -          |
|                       | 500         | -                        | -          | -          | -          |
| Glucose (mg/dL)       | Normal      | 5                        | 5          | 5          | 5          |
| Ketone body (mg/dL)   | -           | 2                        | -          | -          | -          |
|                       | 5           | 3                        | 4          | 4          | 4          |
|                       | 15          | -                        | 1          | 1          | 1          |
| Bilirubin (mg/dL)     | -           | 5                        | 5          | 5          | 5          |
| Occult blood (Ery/μL) | -           | 3                        | 5          | 5          | 5          |
|                       | 10          | 2                        | -          | -          | -          |
| Cast                  | 0           | 5                        | 5          | 5          | 5          |
| Epithelial cell       | 0           | 5                        | 5          | 5          | 5          |
| Leukocyte             | 0           | 5                        | 5          | 5          | 5          |
| Erythrocyte           | 0           | 2                        | 5          | 5          | 5          |
|                       | 1~10        | 3                        | -          | -          | -          |
| Specific gravity      | 1,021~1,030 | -                        | -          | 1          | -          |
|                       | 1,031~1,040 | -                        | 2          | 1          | -          |
|                       | 1,041~1,050 | 3                        | 2          | 1          | 3          |
|                       | 1,051~1,060 | 1                        | -          | 3          | 2          |
|                       | >1,060      | 1                        | 1          | -          | -          |
| <b>Sex : Female</b>   |             |                          |            |            |            |
| Volume (mL)           |             | 5.4 ± 1.6                | 7.2 ± 2.8  | 6.6 ± 5.8  | 9.0 ± 5.2  |
| Color                 | Pale yellow |                          |            |            |            |
|                       | Yellow      | 5                        | 5          | 4          | 3          |
|                       | Amber       | -                        | -          | 1          | 2          |
| Transparency          | Clear       | 5                        | 5          | 5          | 5          |
| pH                    | 7           | -                        | -          | -          | -          |
|                       | 8           | 5                        | 4          | 3          | 5          |
|                       | 9           | -                        | 1          | 2          | -          |
| Protein (mg/dL)       | -           | 2                        | 3          | 3          | 5          |
|                       | 25          | 3                        | 2          | 2          | -          |
|                       | 75          | -                        | -          | -          | -          |
|                       | 150         | -                        | -          | -          | -          |
|                       | 500         | -                        | -          | -          | -          |
| Glucose (mg/dL)       | Normal      | 5                        | 5          | 5          | 5          |
| Ketone body (mg/dL)   | -           | 1                        | -          | -          | -          |
|                       | 5           | 4                        | 4          | 1          | 3          |
|                       | 15          | -                        | 1          | 3          | 2          |
|                       | 50          | -                        | -          | 1          | -          |
| Bilirubin (mg/dL)     | -           | 5                        | 5          | 5          | 5          |
| Occult blood (Ery/μL) | -           | 5                        | 5          | 5          | 5          |
| Cast                  | 0           | 5                        | 5          | 5          | 5          |
| Epithelial cell       | 5           | 5                        | 5          | 5          | 5          |
| Leukocyte             | 0           | 5                        | 5          | 5          | 5          |
| Erythrocyte           | 0           | 5                        | 5          | 5          | 5          |
|                       | 1~10        | -                        | -          | -          | -          |
| Specific gravity      | 1,021~1,030 | -                        | -          | 1          | 2          |
|                       | 1,031~1,040 | -                        | 1          | 1          | -          |
|                       | 1,041~1,050 | 1                        | 1          | -          | 1          |
|                       | 1,051~1,060 | 3                        | 3          | 1          | 1          |
|                       | >1,060      | 1                        | -          | 2          | 1          |

**Table S4.** Summary of Hematological and Clinical Chemistry Parameters

| Parameter                 | Group / Dose (mg/kg/day) |              |               |                |
|---------------------------|--------------------------|--------------|---------------|----------------|
|                           | G1 / 0                   | G2 / 1,250   | G3 / 2,500    | G4 / 5,000     |
| No. of animals            | 10                       | 10           | 10            | 10             |
| <b>Sex : Male</b>         |                          |              |               |                |
| RBC (10 <sup>6</sup> /μL) | 8.68 ± 0.4               | 8.76 ± 0.3   | 8.49 ± 0.1    | 8.46 ± 0.3     |
| HGB (g/dL)                | 15.9 ± 0.5               | 15.9 ± 0.4   | 15.5 ± 0.4    | 15.4 ± 0.3 *   |
| HCT (%)                   | 44.7 ± 1.3               | 44.8 ± 1.2   | 43.7 ± 0.9    | 43.4 ± 1.1 *   |
| MCV (fL)                  | 51.6 ± 1.9               | 51.1 ± 0.9   | 51.5 ± 1.4    | 51.3 ± 1.4     |
| MCH (pg)                  | 18.3 ± 0.8               | 18.2 ± 0.4   | 18.3 ± 0.6    | 18.2 ± 0.7     |
| MCHC (g/dL)               | 35.5 ± 0.4               | 35.6 ± 0.2   | 35.5 ± 0.4    | 35.4 ± 0.6     |
| PLT (10 <sup>3</sup> /μL) | 1021 ± 81                | 980 ± 72     | 893 ± 132     | 936 ± 148      |
| Reti (%)                  | 2.87 ± 0.4               | 2.79 ± 0.3   | 3.09 ± 0.36   | 2.91 ± 0.2     |
| WBC (10 <sup>3</sup> /μL) | 9.78 ± 2.3               | 10.01 ± 2.1  | 9.32 ± 1.96   | 8.58 ± 2.0     |
| NEU (%)                   | 18.3 ± 5.5               | 20.0 ± 8.4   | 20.8 ± 6.9    | 21.3 ± 9.4     |
| LYM (%)                   | 70.8 ± 6.4               | 68.7 ± 8.7   | 67.6 ± 8.0    | 69.0 ± 9.7     |
| MONO (%)                  | 8.8 ± 2.0                | 9.7 ± 2.0    | 10.2 ± 2.1    | 8.3 ± 1.4      |
| EOS (%)                   | 1.8 ± 0.5                | 1.4 ± 0.4    | 1.3 ± 0.6 *   | 1.2 ± 0.4 *    |
| BASO (%)                  | 0.2 ± 0.1                | 0.2 ± 0.1    | 0.2 ± 0.1     | 0.2 ± 0.1      |
| PT (sec)                  | 19.3 ± 0.9               | 19.2 ± 0.5   | 19.1 ± 0.7    | 18.9 ± 0.9     |
| APTT (sec)                | 15.4 ± 1.1               | 15.9 ± 1.9   | 15.8 ± 1.4    | 15.0 ± 2.3     |
| ALT (U/L)                 | 24 ± 3.5                 | 30.7 ± 9.6   | 27.5 ± 4.1    | 26.7 ± 4.7     |
| AST (U/L)                 | 69.1 ± 8.4               | 76.1 ± 22.4  | 68.7 ± 8.5    | 73.3 ± 10.7    |
| ALP (U/L)                 | 245.3 ± 61.7             | 261.7 ± 43.6 | 235.2 ± 49.2  | 248.8 ± 70.5   |
| GGT(U/L)                  | 0.34 ± 0.1               | 0.37 ± 0.1   | 0.23 ± 0.1    | 0.31 ± 0.2     |
| Glu (mg/dL)               | 134 ± 17                 | 135 ± 13     | 132 ± 14      | 124 ± 12       |
| BUN (mg/dL)               | 11.9 ± 1.2               | 12.1 ± 1.4   | 13.0 ± 2.0    | 12.5 ± 1.2     |
| Crea (mg/dL)              | 0.45 ± 0.04              | 0.44 ± 0.05  | 0.46 ± 0.04   | 0.45 ± 0.03    |
| T-bili (mg/dL)            | 0.08 ± 0.03              | 0.07 ± 0.03  | 0.06 ± 0.01   | 0.07 ± 0.03    |
| T-Chol (mg/dL)            | 76 ± 15                  | 93 ± 25      | 71 ± 16       | 80 ± 25        |
| TG (mg/dL)                | 72 ± 20                  | 82 ± 38      | 71 ± 31       | 74 ± 50        |
| TP (g/dL)                 | 5.8 ± 0.2                | 6.0 ± 0.2    | 5.9 ± 0.2     | 6.0 ± 0.3      |
| Alb (g/dL)                | 2.3 ± 0.1                | 2.4 ± 0.1    | 2.3 ± 0.1     | 2.4 ± 0.1      |
| A/G ratio                 | 0.66 ± 0.1               | 0.66 ± 0.04  | 0.64 ± 0.04   | 0.65 ± 0.04    |
| P (mg/dL)                 | 5.62 ± 0.4               | 5.44 ± 0.6   | 5.69 ± 0.3    | 6.15 ± 0.44 *  |
| Ca (mg/dL)                | 9.9 ± 0.4                | 10.2 ± 0.4   | 10.2 ± 0.3    | 10.1 ± 0.3     |
| Na (mmol/L)               | 139.1 ± 1.5              | 138.6 ± 0.7  | 138.5 ± 1.3   | 137.5 ± 2      |
| K (mmol/L)                | 3.89 ± 0.2               | 3.95 ± 0.2   | 3.78 ± 0.2    | 3.87 ± 0.15    |
| Cl (mmol/L)               | 107.8 ± 1.7              | 106.8 ± 0.8  | 106.9 ± 1.6   | 105.5 ± 2.1 ** |
| <b>Sex: Female</b>        |                          |              |               |                |
| RBC (10 <sup>6</sup> /μL) | 8.19 ± 0.5               | 8.21 ± 0.4   | 7.71 ± 0.55 * | 7.94 ± 0.3     |
| HGB (g/dL)                | 15.6 ± 0.8               | 15.8 ± 0.4   | 15.4 ± 0.5    | 15.3 ± 0.6     |
| HCT (%)                   | 42.8 ± 2.1               | 43.6 ± 1.1   | 42.4 ± 1.2    | 42.4 ± 1.4     |
| MCV (fL)                  | 52.3 ± 1.2               | 53.2 ± 1.6   | 55.1 ± 3.0 #  | 53.4 ± 1.2     |
| MCH (pg)                  | 19.0 ± 0.5               | 19.3 ± 0.6   | 20.0 ± 0.9 ** | 19.3 ± 0.6     |
| MCHC (g/dL)               | 36.3 ± 0.2               | 36.2 ± 0.2   | 36.3 ± 0.4    | 36.2 ± 0.6     |
| PLT (10 <sup>3</sup> /μL) | 901 ± 30                 | 928 ± 62     | 903 ± 165     | 890 ± 99       |
| Reti (%)                  | 2.55 ± 0.3               | 2.37 ± 0.4   | 3.54 ± 2.4    | 2.28 ± 0.4     |
| WBC (10 <sup>3</sup> /μL) | 5.78 ± 3.3               | 5.15 ± 1.1   | 5.22 ± 1.2    | 4.70 ± 1.9     |
| NEU (%)                   | 19.8 ± 5.4               | 17.0 ± 6.9   | 14.5 ± 6.9    | 18.2 ± 4.6     |
| LYM (%)                   | 69.7 ± 7.0               | 73.3 ± 7.2   | 76.6 ± 7.7    | 71.4 ± 5.1     |
| MONO (%)                  | 8.4 ± 1.7                | 8.0 ± 1.8    | 7.4 ± 2.1     | 8.4 ± 0.8      |
| EOS (%)                   | 1.8 ± 0.6                | 1.4 ± 0.4    | 1.2 ± 0.6     | 1.7 ± 0.7      |
| BASO (%)                  | 0.3 ± 0.2                | 0.2 ± 0.1    | 0.3 ± 0.1     | 0.3 ± 0.1      |
| PT (sec)                  | 18.1 ± 0.8               | 18.6 ± 0.7   | 18.6 ± 0.9    | 19.0 ± 1.0     |
| APTT (sec)                | 16.0 ± 0.8               | 15.0 ± 1.7   | 15.5 ± 0.9    | 15.4 ± 0.7     |
| ALT (U/L)                 | 26.2 ± 9.5               | 24.8 ± 7.0   | 20.7 ± 4.1    | 20.8 ± 4.8     |
| AST (U/L)                 | 64.9 ± 14.3              | 63.6 ± 11.6  | 65.1 ± 13.2   | 60.3 ± 11.9    |
| ALP (U/L)                 | 134 ± 35.5               | 128.7 ± 40.8 | 126.2 ± 47.2  | 113.2 ± 41.3   |
| GGT(U/L)                  | 0.53 ± 0.3               | 0.47 ± 0.2   | 0.52 ± 0.3    | 0.56 ± 0.24    |
| Glu (mg/dL)               | 133 ± 12                 | 126 ± 16     | 128 ± 22      | 122 ± 13       |
| BUN (mg/dL)               | 11.7 ± 1.8               | 12.6 ± 1.9   | 11.9 ± 2.4    | 11.8 ± 2.1     |
| Crea (mg/dL)              | 0.52 ± 0.04              | 0.53 ± 0.07  | 0.51 ± 0.05   | 0.47 ± 0.05    |
| T-bili (mg/dL)            | 0.09 ± 0.03              | 0.10 ± 0.02  | 0.10 ± 0.03   | 0.07 ± 0.02    |

|                |             |             |               |               |
|----------------|-------------|-------------|---------------|---------------|
| T-Chol (mg/dL) | 102 ± 11    | 94 ± 13     | 85 ± 14 *     | 82 ± 19 *     |
| TG (mg/dL)     | 26 ± 22     | 16 ± 8      | 18 ± 4        | 20 ± 8        |
| TP (g/dL)      | 6.4 ± 0.5   | 6.1 ± 0.4   | 6.1 ± 0.3     | 6.1 ± 0.4     |
| Alb (g/dL)     | 2.9 ± 0.3   | 2.7 ± 0.2   | 2.7 ± 0.3     | 2.7 ± 0.2     |
| A/G ratio      | 0.82 ± 0.1  | 0.79 ± 0.05 | 0.79 ± 0.07   | 0.79 ± 0.06   |
| P (mg/dL)      | 4.05 ± 0.9  | 4.80 ± 0.9  | 4.64 ± 0.7    | 4.73 ± 0.6    |
| Ca (mg/dL)     | 9.9 ± 0.7   | 9.9 ± 0.3   | 9.9 ± 0.3     | 9.7 ± 0.3     |
| Na (mmol/L)    | 138.7 ± 1.0 | 138.6 ± 0.8 | 139.1 ± 1.1   | 137.6 ± 1.0 * |
| K (mmol/L)     | 3.62 ± 0.2  | 3.71 ± 0.3  | 3.70 ± 0.3    | 3.81 ± 0.3    |
| Cl (mmol/L)    | 107.8 ± 1.4 | 107.7 ± 0.7 | 109.2 ± 1.0 * | 107.7 ± 1.1   |

Significantly different from control by Dunnett's t-test : \* p<0.05, \*\*p<0.01

Significantly different from control by Steel test : # p<0.05

**Table S5.** Summary of Mean Absolute Organ Weights

| Week                    | Group / Dose (mg/kg/day) |                 |                 |                 |
|-------------------------|--------------------------|-----------------|-----------------|-----------------|
|                         | G1 / 0                   | G2 / 1,250      | G3 / 2,500      | G4 / 5,000      |
| <b>Organ weight (g)</b> |                          |                 |                 |                 |
| <b>Sex :Male</b>        |                          |                 |                 |                 |
| Body weight             | 590.8 ± 62.1             | 586.2 ± 70.3    | 611.8 ± 63.3    | 576.0 ± 46.5    |
| Brain                   | 2.21 ± 0.05              | 2.17 ± 0.08     | 2.23 ± 0.05     | 2.17 ± 0.04     |
| Pituitary gland         | 0.0135 ± 0.0016          | 0.0126 ± 0.0020 | 0.0123 ± 0.0015 | 0.0134 ± 0.0021 |
| Heart                   | 1.68 ± 0.17              | 1.65 ± 0.18     | 1.64 ± 0.12     | 1.60 ± 0.15     |
| Lung                    | 1.77 ± 0.16              | 1.73 ± 0.19     | 1.79 ± 0.12     | 1.72 ± 0.19     |
| Liver                   | 14.96 ± 1.48             | 16.03 ± 2.86    | 16.63 ± 2.80    | 16.71 ± 2.34    |
| Spleen                  | 0.92 ± 0.16              | 0.87 ± 0.12     | 0.99 ± 0.19     | 0.86 ± 0.11     |
| Kidney                  | 3.40 ± 0.22              | 3.54 ± 0.39     | 3.62 ± 0.27     | 3.74 ± 0.28     |
| Adrenal gland           | 0.0679 ± 0.00857         | 0.0682 ± 0.0070 | 0.0618 ± 0.0084 | 0.0632 ± 0.0070 |
| Testis                  | 3.45 ± 0.73              | 3.68 ± 0.36     | 3.56 ± 0.61     | 3.66 ± 0.37     |
| Prostate                | 0.71 ± 0.12              | 0.73 ± 0.17     | 0.63 ± 0.16     | 0.67 ± 0.12     |
| <b>Organ weight (g)</b> |                          |                 |                 |                 |
| <b>Sex: Female</b>      |                          |                 |                 |                 |
| Body weight             | 326.0 ± 33.3             | 304.8 ± 21.0    | 299.3 ± 29.2    | 309.3 ± 40.0    |
| Brain                   | 1.97 ± 0.06              | 1.98 ± 0.09     | 1.98 ± 0.10     | 2.02 ± 0.13     |
| Pituitary gland         | 0.0187 ± 0.0055          | 0.0184 ± 0.0031 | 0.0174 ± 0.0039 | 0.0168 ± 0.0022 |
| Heart                   | 1.04 ± 0.08              | 0.97 ± 0.08     | 0.97 ± 0.07     | 0.99 ± 0.10     |
| Lung                    | 1.27 ± 0.08              | 1.26 ± 0.05     | 1.24 ± 0.13     | 1.29 ± 0.12     |
| Liver                   | 8.31 ± 0.75              | 7.48 ± 0.49     | 7.85 ± 0.76     | 7.97 ± 1.12     |
| Spleen                  | 0.60 ± 0.06              | 0.53 ± 0.05     | 0.57 ± 0.07     | 0.57 ± 0.08     |
| Kidney                  | 1.97 ± 0.18              | 1.89 ± 0.15     | 1.92 ± 0.15     | 2.11 ± 0.29     |
| Adrenal gland           | 0.0706 ± 0.0154          | 0.0642 ± 0.0117 | 0.0728 ± 0.0085 | 0.0692 ± 0.0077 |
| Ovary                   | 0.0877 ± 0.0149          | 0.0812 ± 0.0229 | 0.0991 ± 0.0094 | 0.0909 ± 0.0185 |
| Uterus                  | 0.58 ± 0.21              | 0.66 ± 0.18     | 0.66 ± 0.26     | 0.55 ± 0.11     |

**Table S6.** Result of Main Study in Male ICR Mice

| Group                                     | Dose  | Route | Hours after dosing | Animal ID          | PCE / (PCE+NCE) | MNPCE / PCE       |
|-------------------------------------------|-------|-------|--------------------|--------------------|-----------------|-------------------|
| Negative control<br>(Water for injection) | 0     | P.O.  | 24                 | 1101               | 149 / 500       | 0 / 4,000         |
|                                           |       |       |                    | 1102               | 149 / 500       | 2 / 4,000         |
|                                           |       |       |                    | 1103               | 143 / 500       | 2 / 4,000         |
|                                           |       |       |                    | 1104               | 146 / 500       | 3 / 4,000         |
|                                           |       |       |                    | 1105               | 150 / 500       | 1 / 4,000         |
|                                           |       |       |                    | Total              | 737 / 2,500     | 8 / 20,000        |
|                                           |       |       |                    | %(Mean $\pm$ S.D.) | 29.5 $\pm$ 0.58 | 0.040 $\pm$ 0.029 |
| Test Substance<br>(KP-1)                  | 1,250 | P.O.  | 24                 | 1201               | 152 / 500       | 3 / 4,000         |
|                                           |       |       |                    | 1202               | 148 / 500       | 2 / 4,000         |
|                                           |       |       |                    | 1203               | 146 / 500       | 2 / 4,000         |
|                                           |       |       |                    | 1204               | 155 / 500       | 0 / 4,000         |
|                                           |       |       |                    | 1205               | 154 / 500       | 1 / 4,000         |
|                                           |       |       |                    | Total              | 755 / 2,500     | 8 / 20,000        |
|                                           |       |       |                    | %(Mean $\pm$ S.D.) | 30.2 $\pm$ 0.77 | 0.040 $\pm$ 0.029 |
|                                           | 2,500 | P.O.  | 24                 | 1301               | 145 / 500       | 0 / 4,000         |
|                                           |       |       |                    | 1302               | 157 / 500       | 2 / 4,000         |
|                                           |       |       |                    | 1303               | 158 / 500       | 2 / 4,000         |
|                                           |       |       |                    | 1304               | 152 / 500       | 3 / 4,000         |
|                                           |       |       |                    | 1305               | 161 / 500       | 2 / 4,000         |
|                                           |       |       |                    | Total              | 773 / 2,500     | 9 / 20,000        |
|                                           |       |       |                    | %(Mean $\pm$ S.D.) | 30.9 $\pm$ 1.25 | 0.045 $\pm$ 0.027 |
| Positive Control<br>(MMC)                 | 5,000 | P.O.  | 24                 | 1401               | 144 / 500       | 1 / 4,000         |
|                                           |       |       |                    | 1402               | 139 / 500       | 1 / 4,000         |
|                                           |       |       |                    | 1403               | 144 / 500       | 1 / 4,000         |
|                                           |       |       |                    | 1404               | 148 / 500       | 2 / 4,000         |
|                                           |       |       |                    | 1405               | 150 / 500       | 1 / 4,000         |
|                                           |       |       |                    | Total              | 725 / 2,500     | 6 / 20,000        |
|                                           |       |       |                    | %(Mean $\pm$ S.D.) | 29.0 $\pm$ 0.85 | 0.030 $\pm$ 0.011 |
|                                           | 2     | I.P.  | 24                 | 1501               | 168 / 500       | 286 / 4,000       |
|                                           |       |       |                    | 1502               | 171 / 500       | 251 / 4,000       |
|                                           |       |       |                    | 1503               | 153 / 500       | 244 / 4,000       |
|                                           |       |       |                    | 1504               | 164 / 500       | 218 / 4,000       |
|                                           |       |       |                    | 1505               | 179 / 500       | 256 / 4,000       |
|                                           |       |       |                    | Total              | 835** / 2,500   | 1,255## / 20,000  |
|                                           |       |       |                    | %(Mean $\pm$ S.D.) | 33.4 $\pm$ 1.91 | 6.275 $\pm$ 0.611 |

P.O.: Per Os, I.P.: Intraperitoneal, MNPCE: Micronucleated polychromatic erythrocyte,  
PCE: Polychromatic erythrocyte, NCE: Normochromatic erythrocyte, MMC: Mitomycin C  
Significantly different from control by Aspin-Welch t-test : \*\* p<0.01,  
Significantly different from control by Mann-Whiney test : ## p<0.01

**Table S7.** Summary of Micronucleus Test

| Historical control values of MNPCE                              |                         |              |    |                                   |                                      |       |                                               |
|-----------------------------------------------------------------|-------------------------|--------------|----|-----------------------------------|--------------------------------------|-------|-----------------------------------------------|
| Group                                                           | Hours after dosing (hr) | Dose (mg/kg) | N  | MNPCE / PCE (%) (Mean $\pm$ S.D.) | Range <sup>1</sup> [MNPCE / PCE] (%) |       | 95 % control limit [MNPCE / PCE] <sup>2</sup> |
|                                                                 |                         |              |    |                                   | MIN                                  | MAX   |                                               |
| Negative control                                                | 24                      | 0            | 32 | 0.042 $\pm$ 0.019                 | 0.007                                | 0.077 | <13                                           |
| Positive control                                                | 24                      | 2            | 32 | 6.119 $\pm$ 1.275                 | 4.988                                | 7.250 | -                                             |
| Historical control values of ratio of PCE to total erythrocytes |                         |              |    |                                   |                                      |       |                                               |
| Group                                                           | Hours after dosing (hr) | Dose (mg/kg) | N  | MNPCE / PCE (%) (Mean $\pm$ S.D.) | Range [MNPCE / PCE] (%)              |       |                                               |
|                                                                 |                         |              |    |                                   | MIN                                  | MAX   |                                               |
| Negative control                                                | 24                      | 0            | 32 | 30.66 $\pm$ 3.006                 | 25.96                                | 35.36 |                                               |
| Positive control                                                | 24                      | 2            | 32 | 29.39 $\pm$ 3.864                 | 24.72                                | 34.07 |                                               |

Negative control: Water for injection, Normal saline injection, Corn oil, 0.5 % methylcellulose 1500 centripoise solution, 0.5% carboxymethylcellulose sodium salt solution, *etc.*

Positive control: Mitomycin C (2 mg/kg, I.P., single dosing)

<sup>1</sup>The range was calculated by the control limit of X derived from X-R value.

<sup>2</sup>Poisson-based 95 % control limits of the historical negative control data.

Table S8. Summary of Main Study

| Test substance            | Dose<br>(µg/mL) | RPD<br>(%) | S9<br>mix | Trt-Ree<br>time (hr) | No. of<br>cell<br>analyzed | Number of cells with structural aberrations |     |     |     |     |     |     |           |                 |            | Number of cells<br>with numerical<br>aberrations |              |         | Others <sup>1</sup> |
|---------------------------|-----------------|------------|-----------|----------------------|----------------------------|---------------------------------------------|-----|-----|-----|-----|-----|-----|-----------|-----------------|------------|--------------------------------------------------|--------------|---------|---------------------|
|                           |                 |            |           |                      |                            | ctd                                         | csb | cte | cse | frg | gap |     | Total (%) |                 | end        | pol                                              | Total<br>(%) |         |                     |
|                           |                 |            |           |                      |                            |                                             |     |     |     |     | ctg | csg | gap-      | gap+            |            |                                                  |              |         |                     |
| Water<br>for<br>injection | 0               | 100        | -         | 6-18                 | 150                        | 0                                           | 0   | 0   | 0   | 0   | 0   | 0   | 1 (0.3)   | 1 (0.3)         | 0          | 1                                                | 1 (0.3)      | 0       |                     |
|                           |                 |            |           |                      | 150                        | 0                                           | 0   | 1   | 0   | 0   | 0   | 0   |           |                 | 0          | 0                                                |              |         |                     |
|                           | 78.1            | 98.1       | -         | 6-18                 |                            | not observed                                |     |     |     |     |     |     |           |                 |            |                                                  |              |         |                     |
| KP-1                      | 156             | 96.2       | -         | 6-18                 | 150                        | 0                                           | 0   | 0   | 0   | 0   | 0   | 0   | 0 (0.0)   | 0 (0.0)         | 0          | 0                                                | 0 (0.0)      | 0       |                     |
|                           |                 |            |           |                      | 150                        | 0                                           | 0   | 0   | 0   | 0   | 0   | 0   |           |                 | 0          | 0                                                |              |         |                     |
|                           | 313             | 93.8       | -         | 6-18                 | 150                        | 0                                           | 0   | 0   | 0   | 0   | 0   | 0   | 0 (0.0)   | 0 (0.0)         | 0          | 0                                                | 0 (0.0)      | 0       |                     |
|                           |                 |            |           |                      | 150                        | 0                                           | 0   | 0   | 0   | 0   | 0   | 0   |           |                 | 0          | 0                                                |              |         |                     |
|                           | 625             | 90.3       | -         | 6-18                 | 150                        | 0                                           | 0   | 0   | 0   | 0   | 1   | 0   | 0 (0.0)   | 1 (0.3)         | 0          | 0                                                | 0 (0.0)      | 0       |                     |
|                           |                 |            |           |                      | 150                        | 0                                           | 0   | 0   | 0   | 0   | 0   | 0   |           |                 | 0          | 0                                                |              |         |                     |
|                           | MMC             | 0.1        | 58.7      | -                    | 6-18                       | 150                                         | 13  | 0   | 42  | 0   | 0   | 0   | 0         | 86** (28.7)     | 86 (28.7)  | 0                                                | 0            | 0 (0.0) | 0                   |
|                           |                 |            |           |                      |                            | 150                                         | 15  | 2   | 40  | 0   | 0   | 2   | 0         |                 |            | 0                                                | 0            |         |                     |
| Water<br>for<br>injection |                 | 0          | 100       | +                    | 6-18                       | 150                                         | 0   | 0   | 1   | 0   | 0   | 1   | 0         | 1 (0.3)         | 2 (0.7)    | 0                                                | 0            | 1 (0.3) | 0                   |
| 150                       | 0               | 0          | 0         | 0                    | 0                          | 0                                           | 0   | 0   | 0   | 0   | 1   |     |           |                 |            |                                                  |              |         |                     |
| KP-1                      | 156             | 87.2       | +         | 6-18                 | 150                        | 0                                           | 0   | 1   | 0   | 0   | 0   | 0   | 1 (0.3)   | 1 (0.3)         | 0          | 0                                                | 1 (0.3)      | 0       |                     |
|                           |                 |            |           |                      | 150                        | 0                                           | 0   | 0   | 0   | 0   | 0   | 0   |           |                 | 0          | 1                                                |              |         |                     |
|                           | 313             | 86.1       | +         | 6-18                 | 150                        | 0                                           | 0   | 0   | 0   | 0   | 0   | 0   | 0 (0.0)   | 0 (0.0)         | 0          | 0                                                | 0 (0.0)      | 0       |                     |
|                           |                 |            |           |                      | 150                        | 0                                           | 0   | 0   | 0   | 0   | 0   | 0   |           |                 | 0          | 0                                                |              |         |                     |
|                           | 625             | 82.1       | +         | 6-18                 | 150                        | 0                                           | 0   | 0   | 0   | 0   | 0   | 0   | 0 (0.0)   | 0 (0.0)         | 0          | 0                                                | 1 (0.3)      | 0       |                     |
|                           |                 |            |           |                      | 150                        | 0                                           | 0   | 0   | 0   | 0   | 0   | 0   |           |                 | 0          | 1                                                |              |         |                     |
|                           | B[a]P           | 20         | 51.4      | +                    | 6-18                       | 150                                         | 10  | 0   | 25  | 1   | 0   | 0   | 0         | 60** (20.0)     | 60 (20.0)  | 0                                                | 0            | 0 (0.0) | 0                   |
|                           |                 |            |           |                      |                            | 150                                         | 7   | 0   | 28  | 0   | 0   | 2   | 0         |                 |            | 0                                                | 0            |         |                     |
| Water<br>for<br>injection | 0               | 100        | -         | 24-0                 | 150                        | 1                                           | 0   | 0   | 0   | 0   | 0   | 0   | 1 (0.3)   | 1 (0.3)         | 0          | 1                                                | 1 (0.3)      | 0       |                     |
|                           |                 |            |           |                      | 150                        | 0                                           | 0   | 0   | 0   | 0   | 0   | 0   |           |                 | 0          | 0                                                |              |         | 0                   |
|                           | 78.1            | 92.1       | -         | 24-0                 |                            | not observed                                |     |     |     |     |     |     |           |                 |            |                                                  |              |         |                     |
| KP-1                      | 156             | 89.7       | -         | 24-0                 | 150                        | 0                                           | 0   | 0   | 0   | 0   | 0   | 0   | 0 (0.0)   | 0 (0.0)         | 0          | 0                                                | 0 (0.0)      | 0       |                     |
|                           |                 |            |           |                      | 150                        | 0                                           | 0   | 0   | 0   | 0   | 0   | 0   |           |                 | 0          | 0                                                |              |         |                     |
|                           | 313             | 85.1       | -         | 24-0                 | 150                        | 0                                           | 0   | 0   | 0   | 0   | 0   | 0   | 1 (0.3)   | 1 (0.3)         | 0          | 1                                                | 1 (0.3)      | 0       |                     |
|                           |                 |            |           |                      | 150                        | 1                                           | 0   | 0   | 0   | 0   | 0   | 0   |           |                 | 0          | 0                                                |              |         |                     |
|                           | 625             | 79.6       | -         | 24-0                 | 150                        | 0                                           | 0   | 0   | 0   | 0   | 0   | 0   | 0 (0.0)   | 0 (0.0)         | 0          | 1                                                | 1 (0.3)      | 0       |                     |
|                           |                 |            |           |                      | 150                        | 0                                           | 0   | 0   | 0   | 0   | 0   | 0   |           |                 | 0          | 0                                                |              |         |                     |
|                           | MMC             | 0.1        | 52.6      | -                    | 24-0                       | 150                                         | 25  | 0   | 60  | 0   | 0   | 0   | 0         | 125**<br>(41.7) | 125 (41.7) | 0                                                | 0            | 0 (0.0) | 0                   |
|                           |                 |            |           |                      |                            | 150                                         | 21  | 1   | 52  | 0   | 0   | 6   | 0         |                 |            | 0                                                | 0            |         |                     |

Aberration: ctg: chromatid gap, csg: chromosome gap, ctb: chromatid break, cte: chromatid exchange, csb: chromosome break, cse: chromosome exchange, frg: fragmentation, end: endoreduplication, pol: polyploidy

MMC: Mitomycin C, B[a]P: Benzo[a]pyrene, RPD: Relative Population Doubling, Trt-Rec time: Treatment-Recovery times, gap-: Total number of cells with structural aberrations excluding gap, gap+: Total number of cells with structural aberrations including gap

<sup>1</sup>Other were excluded from the number of cells with chromosomal aberrations.

Significant difference from negative control by Fisher's exact test: \*\* p<0.01 #: precipitation

Table S9. Historical Control Data

| Historical control values of structural aberrations             |        |                   |    |                                                                 |           |        |                                                                         |     |
|-----------------------------------------------------------------|--------|-------------------|----|-----------------------------------------------------------------|-----------|--------|-------------------------------------------------------------------------|-----|
| Group                                                           | S9 mix | Trt-Rec time (hr) | N  | Structural aberration cells excluding gap (%) (Mean $\pm$ S.D.) | Range (%) |        | 95 % control limit <sup>3</sup> [Structural aberration cells/300 cells] |     |
|                                                                 |        |                   |    |                                                                 | MIN       | MAX    | MIN                                                                     | MAX |
| Negative                                                        | -      | 6-18              | 44 | 0.288 $\pm$ 0.364                                               | 0         | 1.01*  | 0                                                                       | <3  |
|                                                                 | +      | 6-18              | 44 | 0.311 $\pm$ 0.390                                               | 0         | 1.09*  | 0                                                                       | <3  |
|                                                                 | -      | 24-0              | 42 | 0.246 $\pm$ 0.361                                               | 0         | 0.87*  | 0                                                                       | <2  |
| Positive                                                        | -      | 6-18 <sup>1</sup> | 39 | 23.44 $\pm$ 5.667                                               | 11.09*    | 35.78* |                                                                         |     |
|                                                                 | +      | 6-18 <sup>2</sup> | 39 | 24.64 $\pm$ 4.922                                               | 12.13*    | 37.15* |                                                                         |     |
|                                                                 | -      | 24-0 <sup>1</sup> | 37 | 35.37 $\pm$ 6.862                                               | 19.09*    | 51.65* |                                                                         |     |
| Historical control values of ratio of PCE to total erythrocytes |        |                   |    |                                                                 |           |        |                                                                         |     |
| Group                                                           | S9 mix | Trt-Rec time (hr) | N  | Numerical aberration cells (%) (Mean $\pm$ S.D.)                | Range (%) |        | 95 % control limit <sup>3</sup> [Structural aberration cells/300 cells] |     |
|                                                                 |        |                   |    |                                                                 | MIN       | MAX    | MIN                                                                     | MAX |
| Negative                                                        | -      | 6-18              | 44 | 0.174 $\pm$ 0.292                                               | 0         | 0.83*  | 0                                                                       | <2  |
|                                                                 | +      | 6-18              | 44 | 0.167 $\pm$ 0.264                                               | 0         | 0.97*  | 0                                                                       | <2  |
|                                                                 | -      | 24-0              | 42 | 0.262 $\pm$ 0.290                                               | 0         | 1.13*  | 0                                                                       | <2  |

Negative control: Water for injection, Dimethyl sulfoxide, Acetone,

Trt-Rex time: Treatment-Recovery times

<sup>1</sup>Mitomycin C (0.1  $\mu$ g/mL), <sup>2</sup>Benzo[a]pyrene (20  $\mu$ g/mL), <sup>3</sup>Poisson-based 95 % control limits of the historical negative control data.

N: The total number of chromosome aberration test

The above historical control values were obtained from the data pooled from Jul. 15, 2013 to May 22, 2017.

\*The range was calculated by the control limit of X derived from X-R-Rs value.
